# Supplementary material
Source: PubMed Central journal article supplement (PMC4040330)

Supplementary Figure 1

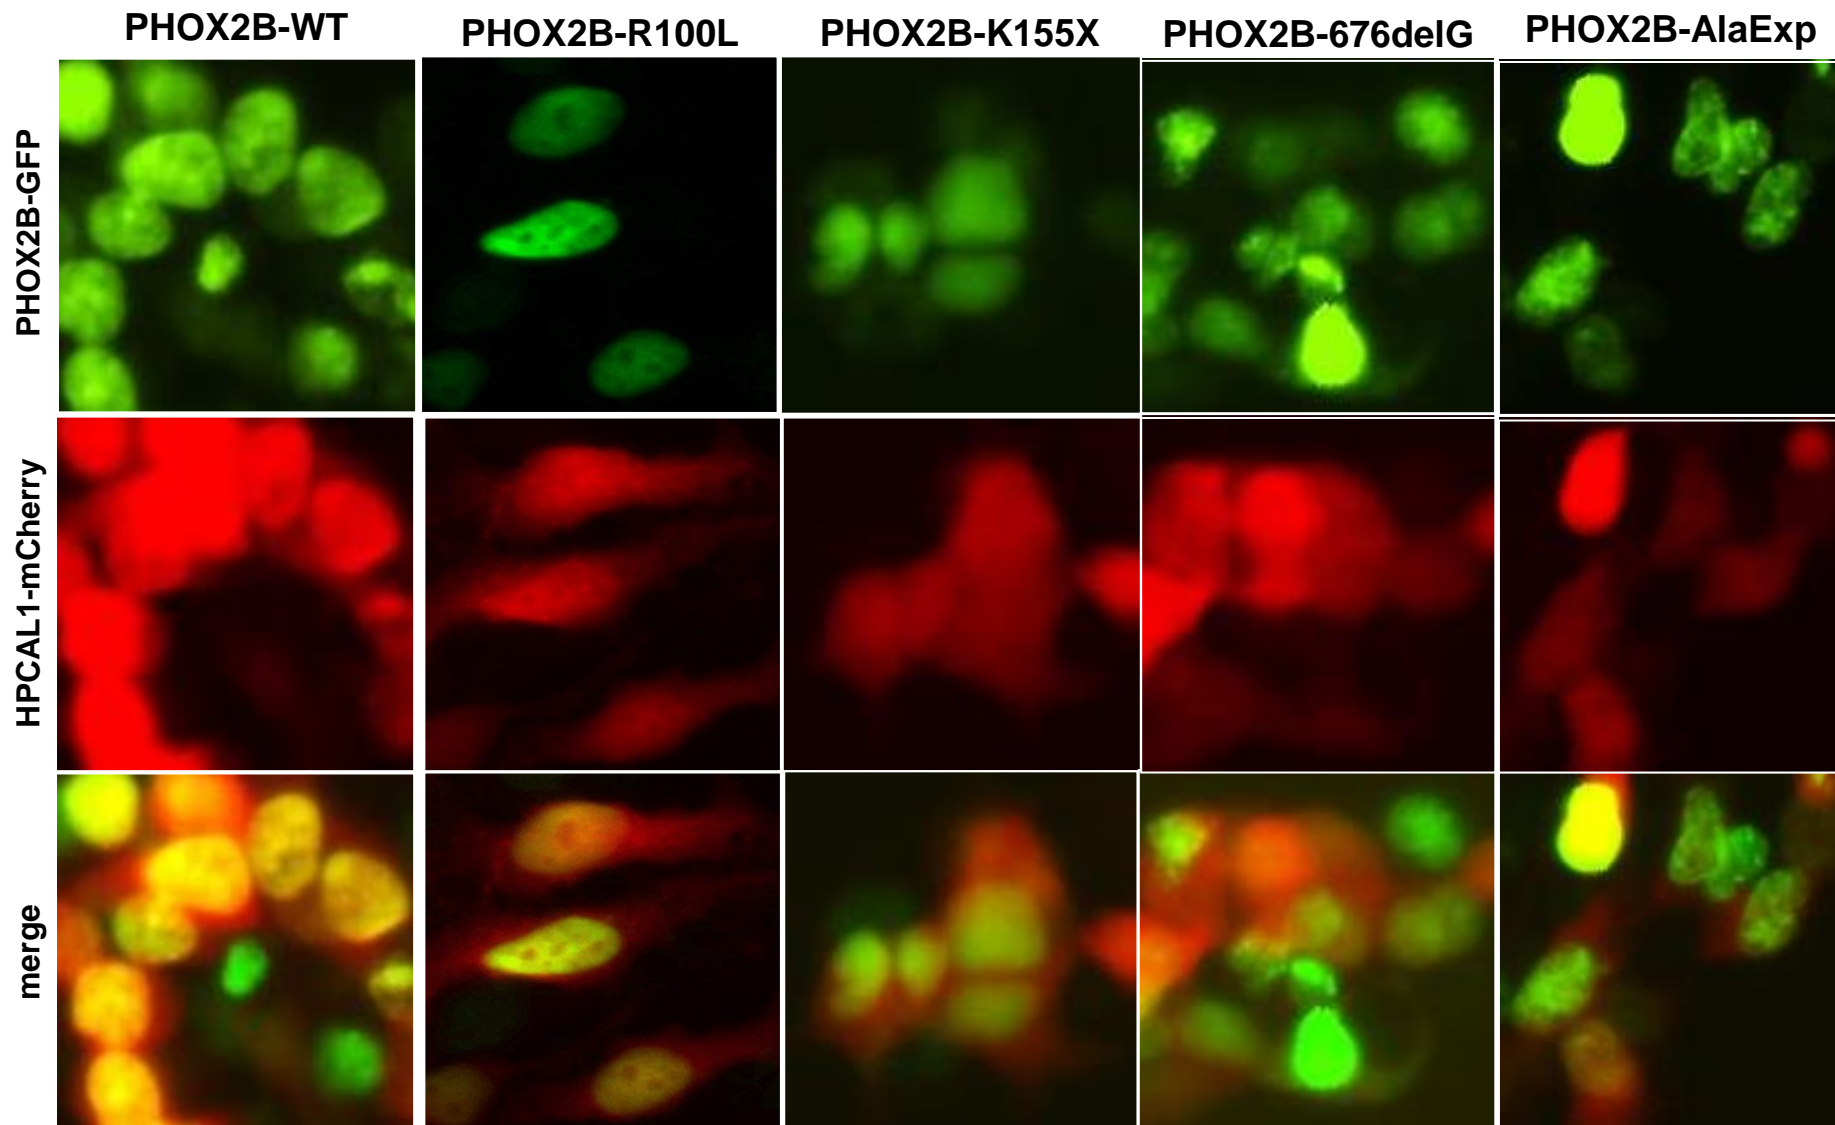

Supplementary Figure 2

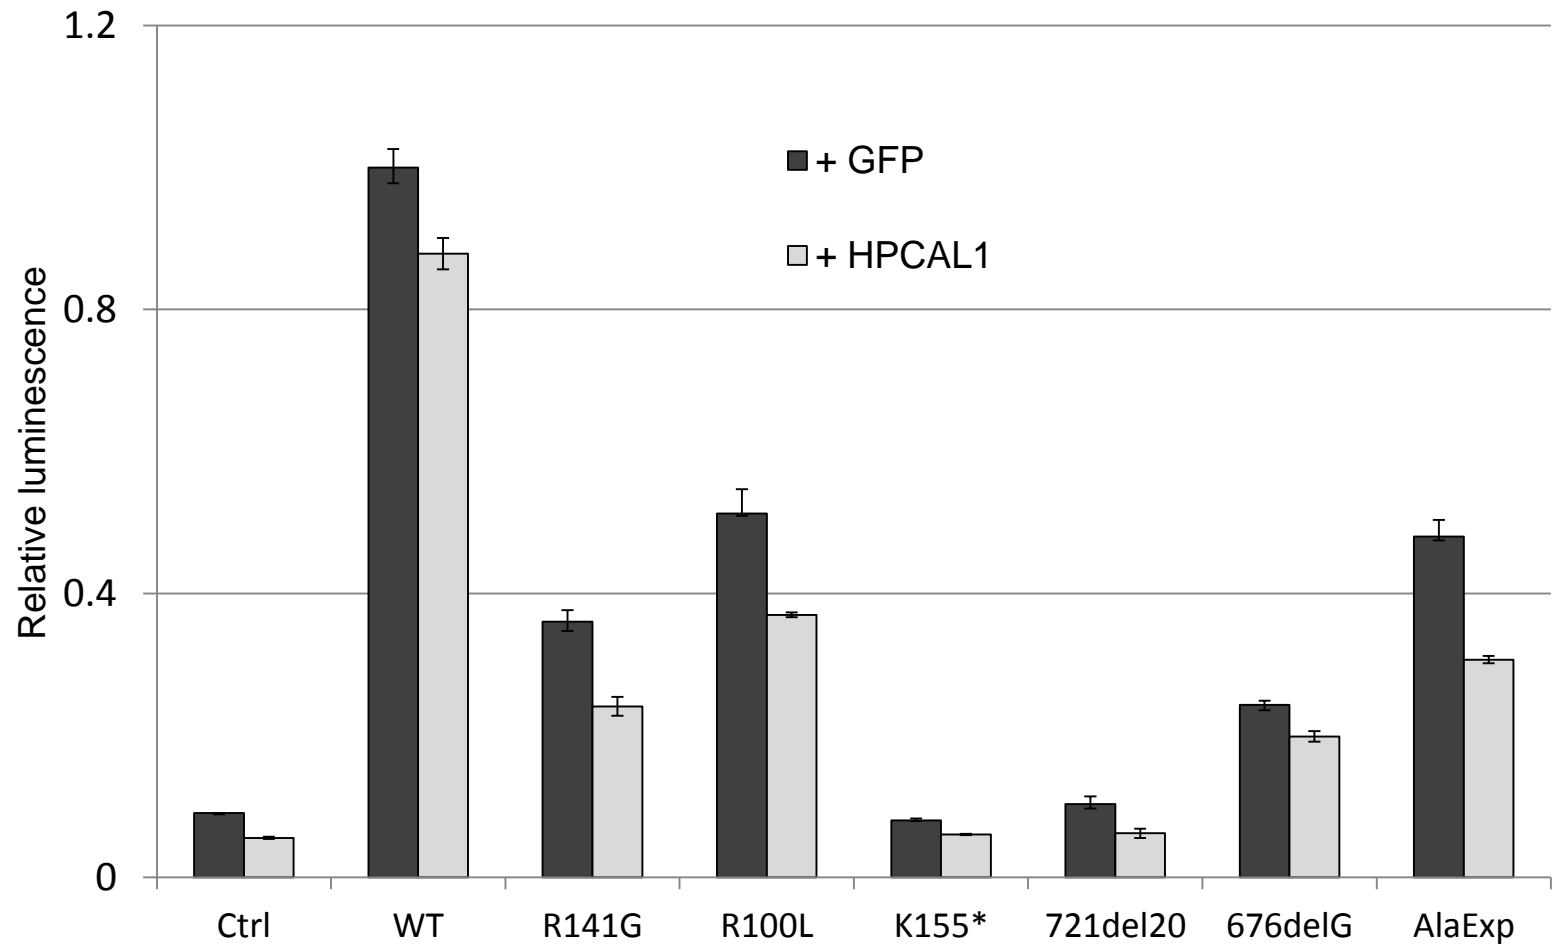

# Supplementary Figure 3

**Untransfected**

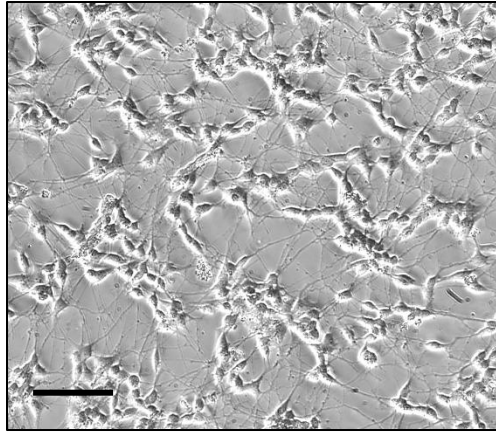

**Control shRNA**

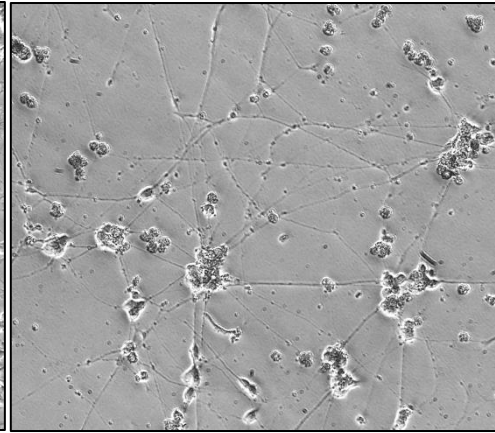

***HPCAL1* shRNA #3**

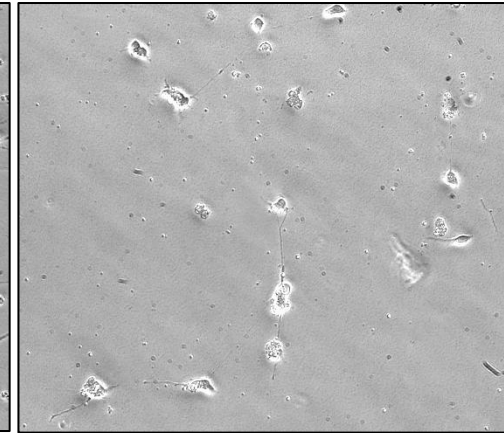

Supplement: NIHMS580795-supplement-Supplementary_figures.pdf [file NIHMS580795-supplement-Supplementary_figures.pdf]
